# Supplementary material for: Synthesis, photophysical properties, bioimaging potential andin vitrotoxicity studies of naphthalimide imidazole boron complexes
Source: Royal Society of Chemistry journal article supplement (doi:10.1039/d3nj02622a), 2023-01-01
Supplement: d3nj02622a1.pdf [file d3nj02622a1.pdf]

## Synthesis, photophysical, bioimaging potential and *in vitro* toxicity studies of naphthalimide imidazole boron complexes

Ramu V. Ranga Naidu Chinta<sup>a</sup>, Sushree Sulava<sup>b</sup>, Basava Punna Rao Aradhyula<sup>a</sup>, HarithaLakshmi Jandhyam<sup>b</sup>, Debasmita Pankaj Alone<sup>b,c\*</sup> and Krishnan Venkatasubbaiah<sup>a,c\*</sup>

<sup>a</sup>*School of Chemical Sciences, National Institute of Science Education and Research (NISER), Bhubaneswar, an OCC of Homi Bhabha National Institute, Bhubaneswar-752050, Odisha, India. E-mail: krishnv@niser.ac.in*

<sup>b</sup>*School of Biological Sciences, National Institute of Science Education and Research (NISER), Bhubaneswar, an OCC of Homi Bhabha National Institute, Bhubaneswar-752050, Odisha, India. E-mail: debasmita@niser.ac.in*

<sup>c</sup>*Center for Interdisciplinary Sciences (CIS), National Institute of Science Education and Research (NISER), an OCC of Homi Bhabha National Institute, Bhubaneswar-752050, Odisha, India.*

### General Information

Vacuum line techniques were used for handlings air and moisture sensitive compounds. All reagents and metal precursors used for the reactions were purchased from spectrochem, Alfa-aesar and Sigma-Aldrich otherwise mentioned. The 2-butyl-6-hydroxy-1,3-dioxo-2,3-dihydro-1H-benzo[de]isoquinoline-5-carbaldehyde was synthesized by adopting the literature procedure. Acetic acid, dichloromethane (DCM), tetrahydrofuran (THF), and toluene were purchased from Spectrochem India. Toluene and THF were distilled from Na/benzophenone prior to use. Chlorinated solvents were distilled from CaH<sub>2</sub>. <sup>1</sup>H NMR (400 MHz, 700 MHz), <sup>13</sup>C NMR (100 MHz, 176 MHz), <sup>11</sup>B NMR (128 MHz), <sup>19</sup>F NMR (376 MHz) spectra were recorded on a Bruker ARX 400 and 700 spectrometers operating at 400 MHz and 700 MHz respectively. All <sup>1</sup>H and <sup>13</sup>C NMR spectra were referenced internally to residual solvent signals namely chloroform ( $\delta = 7.26$  <sup>1</sup>H;  $\delta = 77.16$  <sup>13</sup>C in ppm), <sup>11</sup>B NMR spectra were referenced externally to BF<sub>3</sub>·OEt<sub>2</sub> in CDCl<sub>3</sub> ( $\delta = 0$ ), and <sup>19</sup>F NMR was recorded with reference to  $\alpha,\alpha,\alpha$ -trifluorotoluene. All NMR spectra were recorded at ambient temperature. Chemical shifts in all the NMR spectra are reported in ppm ( $\delta$ ) with the multiplicities represented by singlet (s), doublet (d), triplet (t), quartet (q), multiplet (m), doublet of doublet (dd) and broad (br). Coupling constants (*J*) are reported in Hertz. Melting points for the solid compounds were measured on a Fischer John's melting point apparatus and mentioned as obtained. ESI-MS spectra were obtained from Bruker, microTOF-QII mass spectrometer. Elemental analyses were performed in a Euro Vector EA 3000 CHNS analyzer. Distilled and degassed solvents used for photo physical properties. UV-Visible spectral measurements were performed using Jasco Lambda 750 UV/Visible spectrometer. All the fluorescence spectral measurements, absolute fluorescence quantum yields in solution and solid-state were performed with Edinburg

fluorescence FS5 spectrophotometer and the instrumental response corrected for each experiment. Integrating sphere method was used for calculating the quantum yields.

Single crystal X-ray diffraction data were collected on Rigaku diffractometer at 293 K, 293 K and 130 K for complexes **1-3** respectively using Cu-K $\alpha$  radiation ( $\lambda = 1.54184$ ). SHELXT program was used for solving the crystal structures and simultaneous refinement was done<sup>1</sup> with least-squares minimization using SHELXL incorporated in Olex2<sup>2</sup>. In order to refine non-hydrogen atoms anisotropic displacement coefficients were used and the hydrogen atoms were placed at calculated positions and were refined as riding atoms. CCDC number 2267326-2267328.

Stock solution preparation: 3.82 mg of the compound was dissolved in 250 microlitres of DMSO to make a stock solution of 25 mM. 1 microlitre of this stock solution was diluted with 999 microlitres of DMEM (Cell culture medium) to yield a working concentration of 25 micromolar. 100 microlitre of this working concentration solution was added to each well for 25 micromolar concentration treatment so that the final DMSO concentration was 0.1%. Similarly, for the control well, 1 microlitre of DMSO was diluted with 999 microlitres of DMEM, and 100 microlitres of this solution were added to each well of the vehicle-treated lane so that the final DMSO concentration was 0.1%.

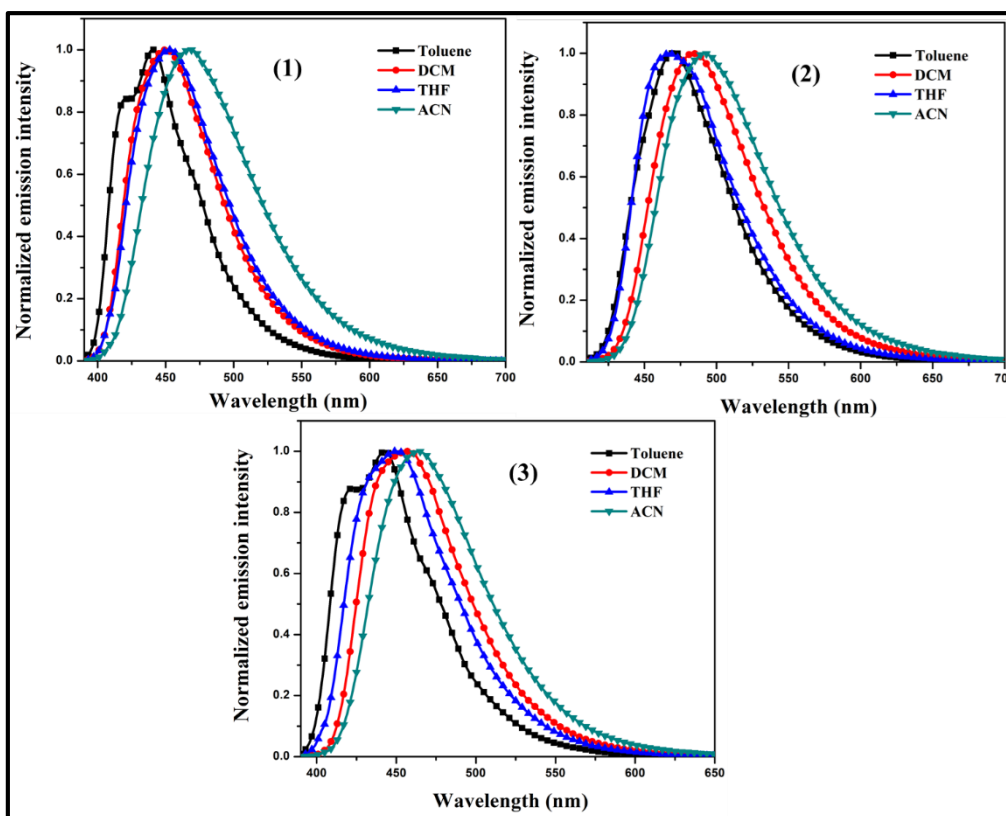

**Figure S1:** Normalized fluorescence spectra of the boron complexes **1-3** with increasing solvent polarity at concentration of 20  $\mu\text{M}$ .

**Table S1:** Crystallographic information and refinement parameters for complexes **1-3**

| <b>Crystal data and structure refinement parameters</b> |                                                                                                      |                                                                                                   |                                                                                                                      |
|---------------------------------------------------------|------------------------------------------------------------------------------------------------------|---------------------------------------------------------------------------------------------------|----------------------------------------------------------------------------------------------------------------------|
|                                                         | <b>1</b>                                                                                             | <b>2</b>                                                                                          | <b>3</b>                                                                                                             |
| Empirical formula                                       | C <sub>37</sub> H <sub>28</sub> BF <sub>2</sub> N <sub>3</sub> O <sub>3</sub> .C<br>HCl <sub>3</sub> | C <sub>49</sub> H <sub>38</sub> BN <sub>3</sub> O <sub>3</sub> .(CHCl <sub>3</sub> ) <sub>2</sub> | C <sub>49</sub> H <sub>28</sub> BF <sub>10</sub> N <sub>3</sub><br>O <sub>3</sub> .(CHCl <sub>3</sub> ) <sub>2</sub> |
| Formula weight                                          | 730.80                                                                                               | 966.37                                                                                            | 1146.29                                                                                                              |
| Temperature/K                                           | 293(2)                                                                                               | 293(2)                                                                                            | 130(20)                                                                                                              |
| crystal system                                          | Triclinic                                                                                            | Triclinic                                                                                         | Triclinic                                                                                                            |
| space group                                             | <i>P</i> $\bar{1}$                                                                                   | <i>P</i> $\bar{1}$                                                                                | <i>P</i> $\bar{1}$                                                                                                   |
| a [Å]                                                   | 11.5584(4)                                                                                           | 10.7782(2)                                                                                        | 10.8114(3)                                                                                                           |
| b [Å]                                                   | 12.9493(5)                                                                                           | 11.7248(2)                                                                                        | 12.1669(3)                                                                                                           |
| c [Å]                                                   | 13.6334(5)                                                                                           | 20.6634(2)                                                                                        | 20.5830(4)                                                                                                           |
| $\alpha$ [°]                                            | 100.768(3)                                                                                           | 84.1410(10)                                                                                       | 84.284(2)                                                                                                            |
| $\beta$ [°]                                             | 97.117(3)                                                                                            | 86.9470(10)                                                                                       | 86.457(2)                                                                                                            |
| $\gamma$ [°]                                            | 113.238(3)                                                                                           | 65.911(2)                                                                                         | 63.952(3)                                                                                                            |
| Volume /Å <sup>3</sup>                                  | 1797.32(12)                                                                                          | 2371.22(7)                                                                                        | 2419.91(12)                                                                                                          |
| <i>Z</i>                                                | 2                                                                                                    | 2                                                                                                 | 2                                                                                                                    |
| $\rho_{\text{calc}}$ [g cm <sup>-3</sup> ]              | 1.350                                                                                                | 1.353                                                                                             | 1.573                                                                                                                |
| $\mu$ (CuK $\alpha$ ) [mm <sup>-1</sup> ]               | 2.740                                                                                                | 3.671                                                                                             | 4.008                                                                                                                |
| <i>F</i> (000)                                          | 752.0                                                                                                | 996.0                                                                                             | 1156.0                                                                                                               |
| Crystal size [mm] <sup>3</sup>                          | 0.15 × 0.13 × 0.09                                                                                   | 0.16 × 0.13 × 0.11                                                                                | 0.15 × 0.12 ×<br>0.11                                                                                                |
| $\theta$ range [°]                                      | 3.382- 65.0                                                                                          | 4.146-68.244                                                                                      | 4.057-66.987                                                                                                         |
| Index ranges                                            | -13 ≤ <i>h</i> ≤ 13,<br>-15 ≤ <i>k</i> ≤ 15,<br>-16 ≤ <i>l</i> ≤ 15                                  | -12 ≤ <i>h</i> ≤ 12,<br>-14 ≤ <i>k</i> ≤ 14,<br>-24 ≤ <i>l</i> ≤ 19                               | -12 ≤ <i>h</i> ≤ 12,<br>-14 ≤ <i>k</i> ≤ 13,<br>-24 ≤ <i>l</i> ≤ 18                                                  |
| reflections collected                                   | 23597                                                                                                | 32740                                                                                             | 29208                                                                                                                |
| Independent reflns                                      | 6104<br>[ <i>R</i> <sub>int</sub> = 0.0685]                                                          | 8654<br>[ <i>R</i> <sub>int</sub> = 0.0536]                                                       | 8632<br>[ <i>R</i> <sub>int</sub> = 0.2132]                                                                          |
| data/restraints/parameters                              | 6104/105/491                                                                                         | 8654/138/652                                                                                      | 8632/63/705                                                                                                          |
| Goodness-of-fit on <i>F</i> <sup>2</sup>                | 1.057                                                                                                | 1.090                                                                                             | 1.519                                                                                                                |
| Final <i>R</i> indexes [ <i>I</i> ≥ 2σ ( <i>I</i> )]    | <i>R</i> <sub>1</sub> = 0.0648, <i>wR</i> <sub>2</sub> =<br>0.2024                                   | <i>R</i> <sub>1</sub> = 0.0609, <i>wR</i> <sub>2</sub> = 0.1852                                   | <i>R</i> <sub>1</sub> =<br>0.1420, <i>wR</i> <sub>2</sub> =<br>0.3507                                                |
| <i>R</i> indexes [all data]                             | <i>R</i> <sub>1</sub> = 0.0721, <i>wR</i> <sub>2</sub><br>= 0.2099                                   | <i>R</i> <sub>1</sub> = 0.0661, <i>wR</i> <sub>2</sub> = 0.1902                                   | <i>R</i> <sub>1</sub> =<br>0.1653, <i>wR</i> <sub>2</sub> =<br>0.3699                                                |
| Largest diff.peak/hole/e Å <sup>-3</sup>                | 0.45/-0.40                                                                                           | 0.57/-0.46                                                                                        | 1.34/-0.88                                                                                                           |

**Table S2:** List of selected bond lengths [ $\text{\AA}$ ] and bond angles [ $^\circ$ ] for complexes **1-3**.

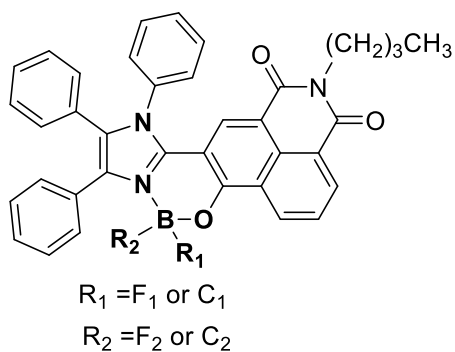

|                                  | <b>1</b>  |                                   | <b>2</b>  |                                  | <b>3</b>  |
|----------------------------------|-----------|-----------------------------------|-----------|----------------------------------|-----------|
| Bond lengths [ $\text{\AA}$ ]    |           |                                   |           |                                  |           |
| B-F <sub>1</sub>                 | 1.369 (3) | B-O                               | 1.513 (3) | B-O                              | 1.482(6)  |
| B-F <sub>2</sub>                 | 1.369 (3) | B-N                               | 1.608 (3) | B-N                              | 1.577 (5) |
| B-O                              | 1.449 (3) | B-C <sub>1</sub>                  | 1.609(3)  | B-C <sub>1</sub>                 | 1.639 (7) |
| B-N                              | 1.571 (2) | B-C <sub>2</sub>                  | 1.614 (3) | B-C <sub>2</sub>                 | 1.636 (7) |
| Bond angles [ $^\circ$ ]         |           |                                   |           |                                  |           |
| F <sub>2</sub> -B-F <sub>1</sub> | 111.5 (2) | C <sub>1</sub> -B1-C <sub>2</sub> | 117.4 (2) | N-B-O                            | 107.4 (3) |
| O-B-F <sub>1</sub>               | 109.2 (2) | O-B-C <sub>2</sub>                | 108.9 (2) | C <sub>1</sub> -B-C <sub>2</sub> | 116.4 (3) |
| O-B-F <sub>2</sub>               | 109.9(2)  | O-B-C <sub>1</sub>                | 106.1 (2) | O-B-C <sub>2</sub>               | 105.2 (4) |
| N-B-F <sub>1</sub>               | 108.9 (2) | N-B-C <sub>1</sub>                | 108.9 (2) | O-B-C <sub>1</sub>               | 106.8 (4) |
| N-B-F <sub>2</sub>               | 109.0 (2) | N-B-C <sub>2</sub>                | 110.1 (2) | N-B-C <sub>1</sub>               | 112.6 (4) |
| N-B-O                            | 108.5 (2) | O-B-N                             | 104.4 (2) | N-B-C <sub>2</sub>               | 107.8 (3) |

**Table S3.** Photophysical data for imidazole boron complexes **1-3** and **L**.

|          | Solvent                         | $\lambda_{\max}^a$ (nm) | $\epsilon_{\max}$ ( $M^{-1}cm^{-1}$<br>$\times 10^3$ ) | $\lambda_{em}^{[a,b]}$<br>(nm) | $\Phi_F^{[c]}$<br>(%) | Stokes shift<br>( $cm^{-1}$ ) |
|----------|---------------------------------|-------------------------|--------------------------------------------------------|--------------------------------|-----------------------|-------------------------------|
| <b>1</b> | Toluene                         | 321, 367                | 45.2, 14.7                                             | 421, 441                       | 45                    | 4572                          |
|          | CH <sub>2</sub> Cl <sub>2</sub> | 319, 365                | 46.2, 14.8                                             | 450                            | 56                    | 5175                          |
|          | THF                             | 319, 364                | 46.1, 14.6                                             | 453                            | 65                    | 5397                          |
|          | CH <sub>3</sub> CN              | 315, 362                | 49.4, 13.3                                             | 468                            | 66                    | 6256                          |
|          | TLF                             | 319, 365                |                                                        | 502                            | 37                    | 7476                          |
| <b>2</b> | Toluene                         | 325, 364                | 42.2, 9.7                                              | 471                            | 64                    | 6241                          |
|          | CH <sub>2</sub> Cl <sub>2</sub> | 325, 375                | 45.2, 16.2                                             | 485                            | 87                    | 6048                          |
|          | THF                             | 323, 372                | 42.0, 13.3                                             | 472                            | 86                    | 5695                          |
|          | CH <sub>3</sub> CN              | 321, 369                | 41.5, 9.7                                              | 495                            | 78                    | 6898                          |
|          | TLF                             | 325, 356,<br>375        |                                                        | 493                            | 58                    | 6383                          |
| <b>3</b> | Toluene                         | 322, 371                | 42.1, 14.4                                             | 428, 448                       | 31                    | 4633                          |
|          | CH <sub>2</sub> Cl <sub>2</sub> | 322, 371                | 42.6, 14.3                                             | 458                            | 56                    | 5120                          |
|          | THF                             | 320, 369                | 44.9, 14.7                                             | 455                            | 43                    | 5122                          |
|          | CH <sub>3</sub> CN              | 319, 369                | 44.3, 13.4                                             | 467                            | 69                    | 5687                          |
|          | TLF                             | 322, 371                |                                                        | 454                            | 31                    | 4928                          |
| <b>L</b> | Toluene                         | 325, 393                | 34.9, 5.5                                              | 472                            | 24                    | 4259                          |
|          | CH <sub>2</sub> Cl <sub>2</sub> | 325, 395                | 41.5, 7.9                                              | 495                            | 47                    | 5114                          |
|          | THF                             | 323, 390                | 36.29, 5.5                                             | 496                            | 35                    | 5480                          |
|          | CH <sub>3</sub> CN              | 321,391                 | 53.0, 5.3                                              | 512                            | 47                    | 6044                          |

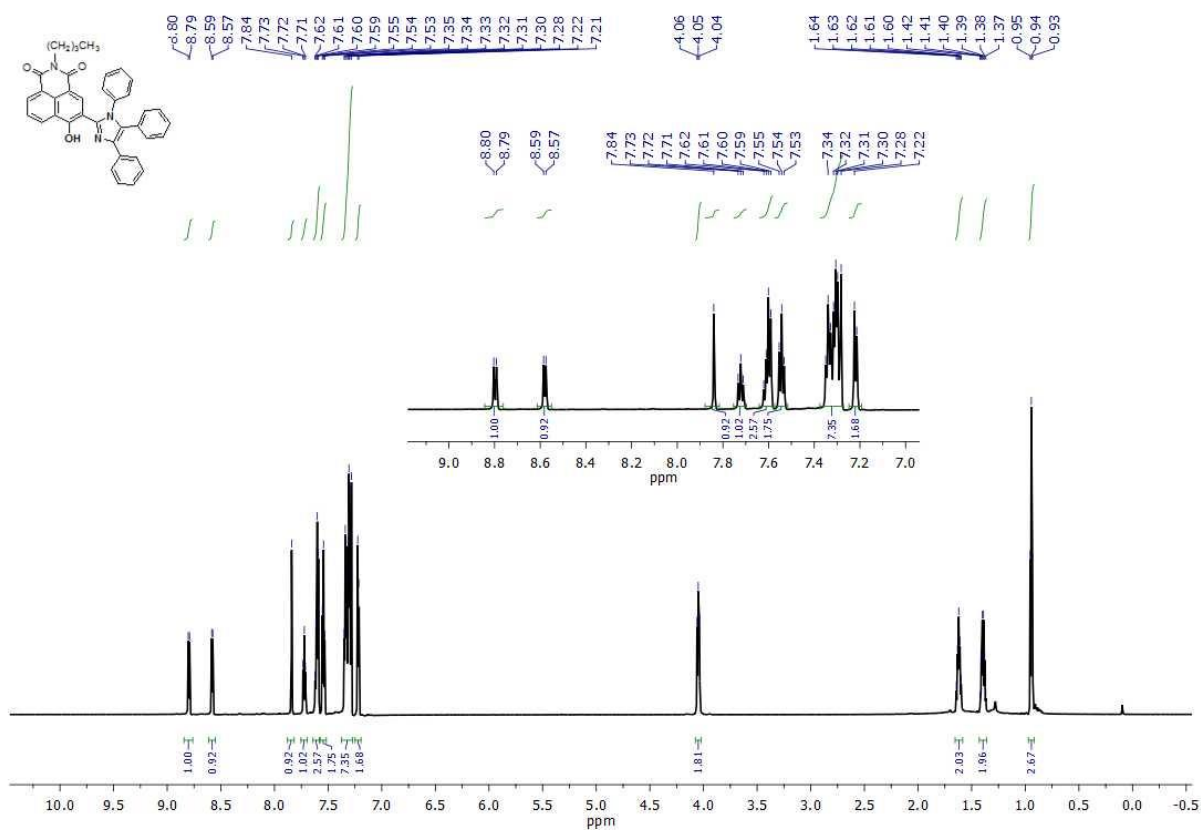

**Figure S2: <sup>1</sup>H NMR spectrum of ligand (L)**

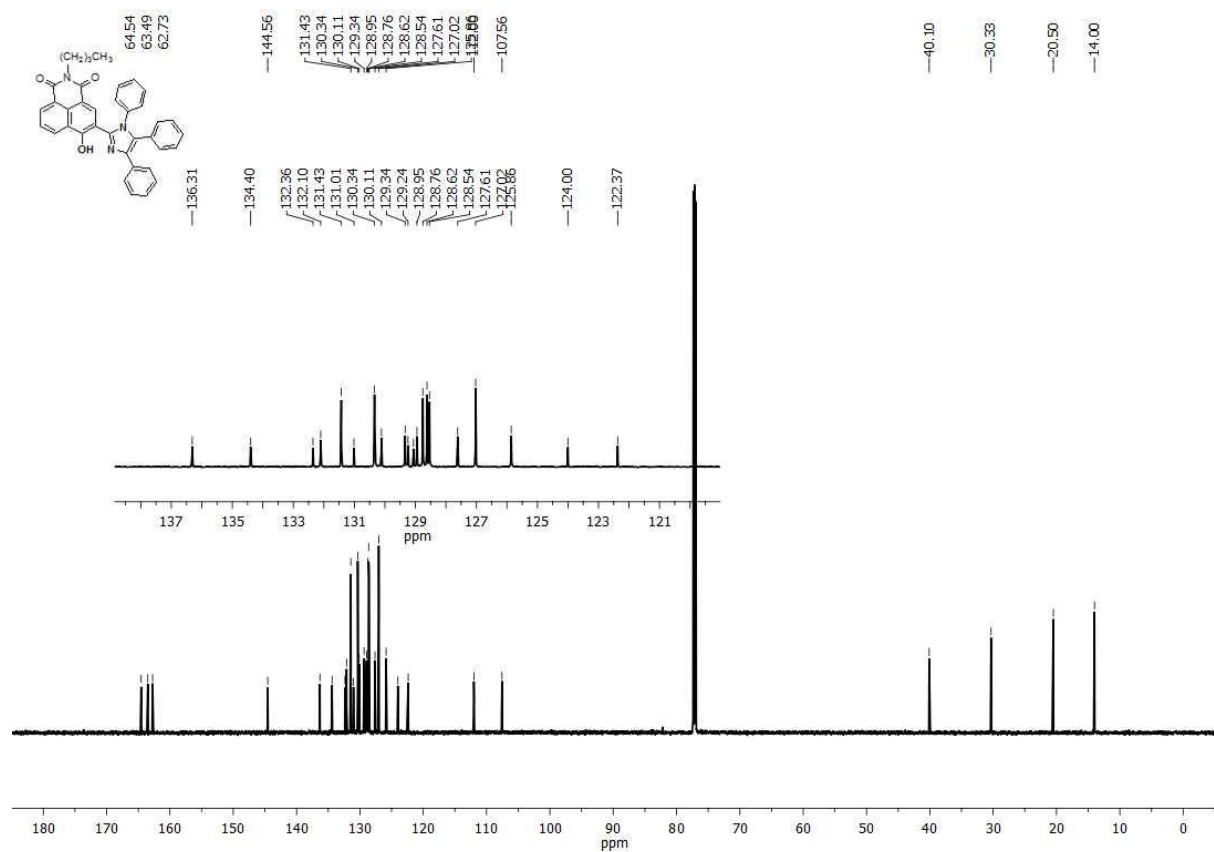

**Figure S3: <sup>13</sup>C NMR spectrum of ligand (L)**

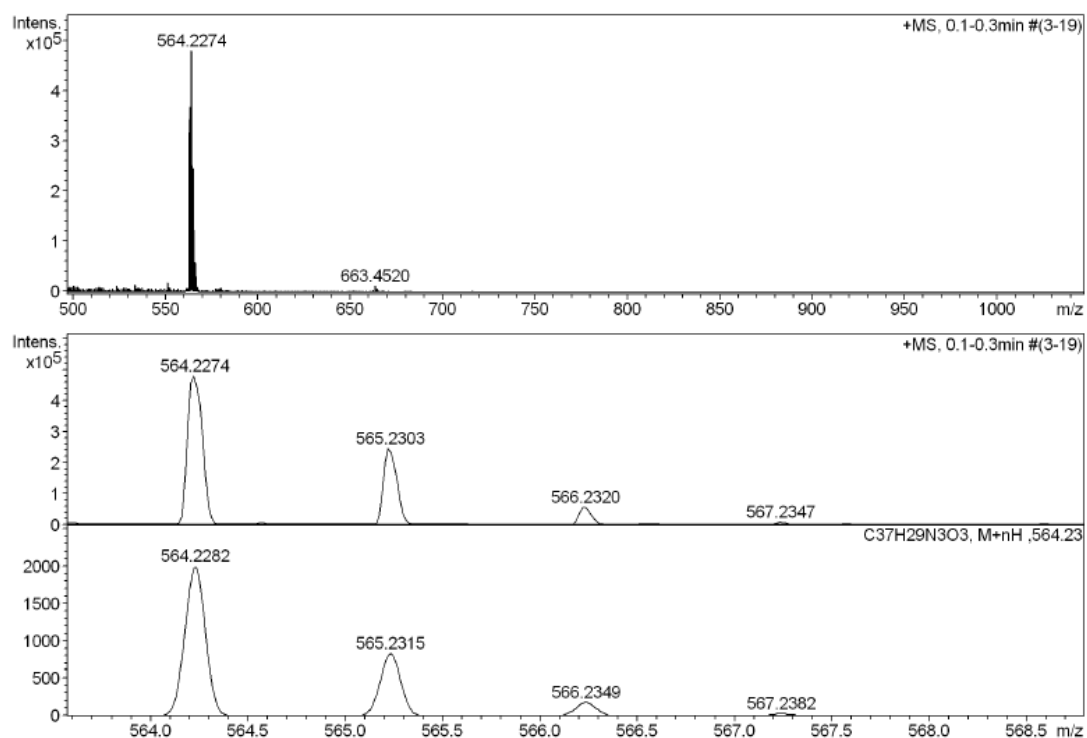

Figure S4: HR-MS of ligand (L)

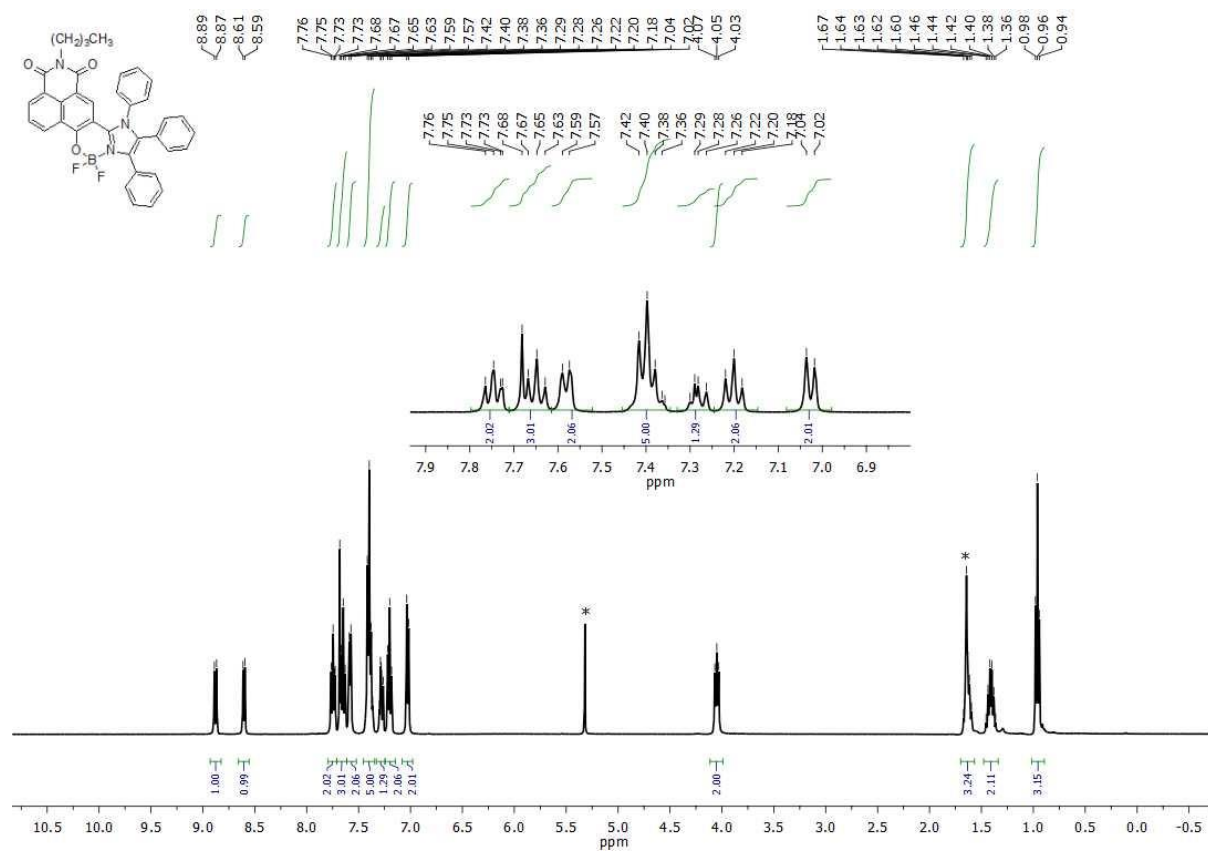

Figure S5:  $^1H$  NMR spectrum of complex 1



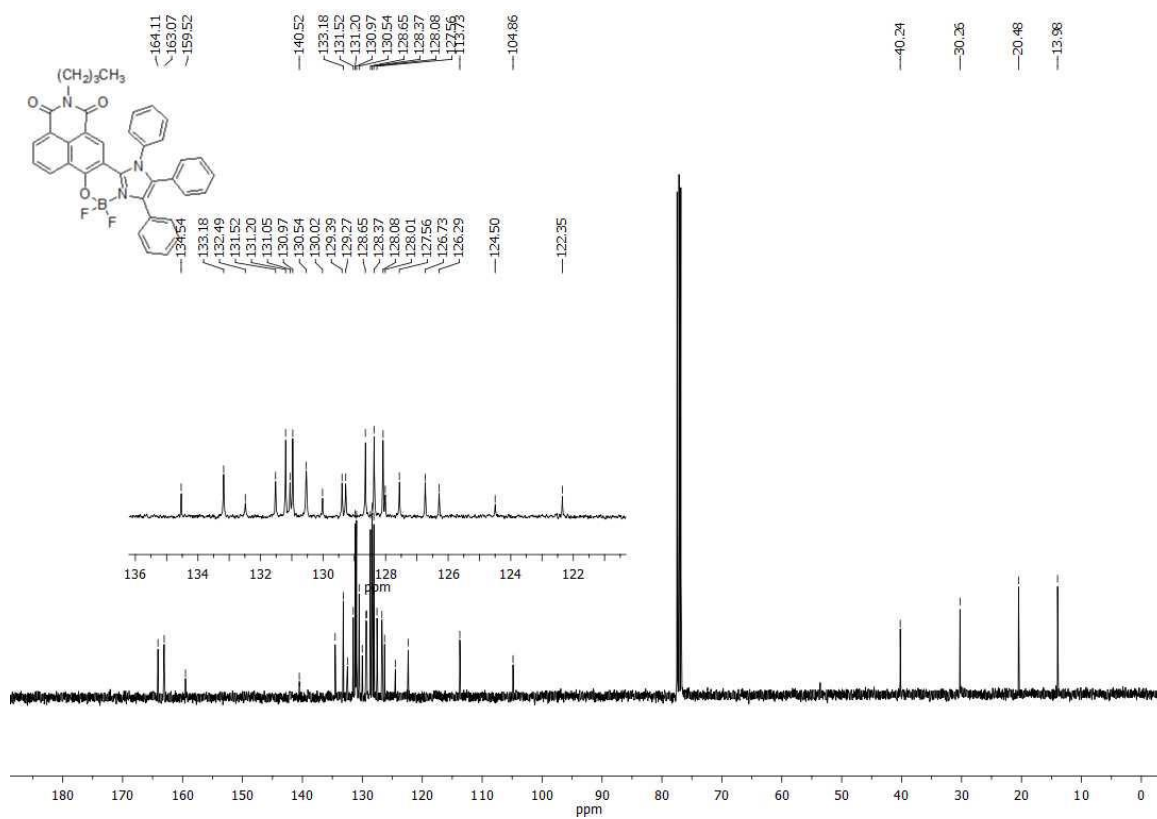

**Figure S6:**  $^{13}\text{C}$  NMR spectrum of complex 1

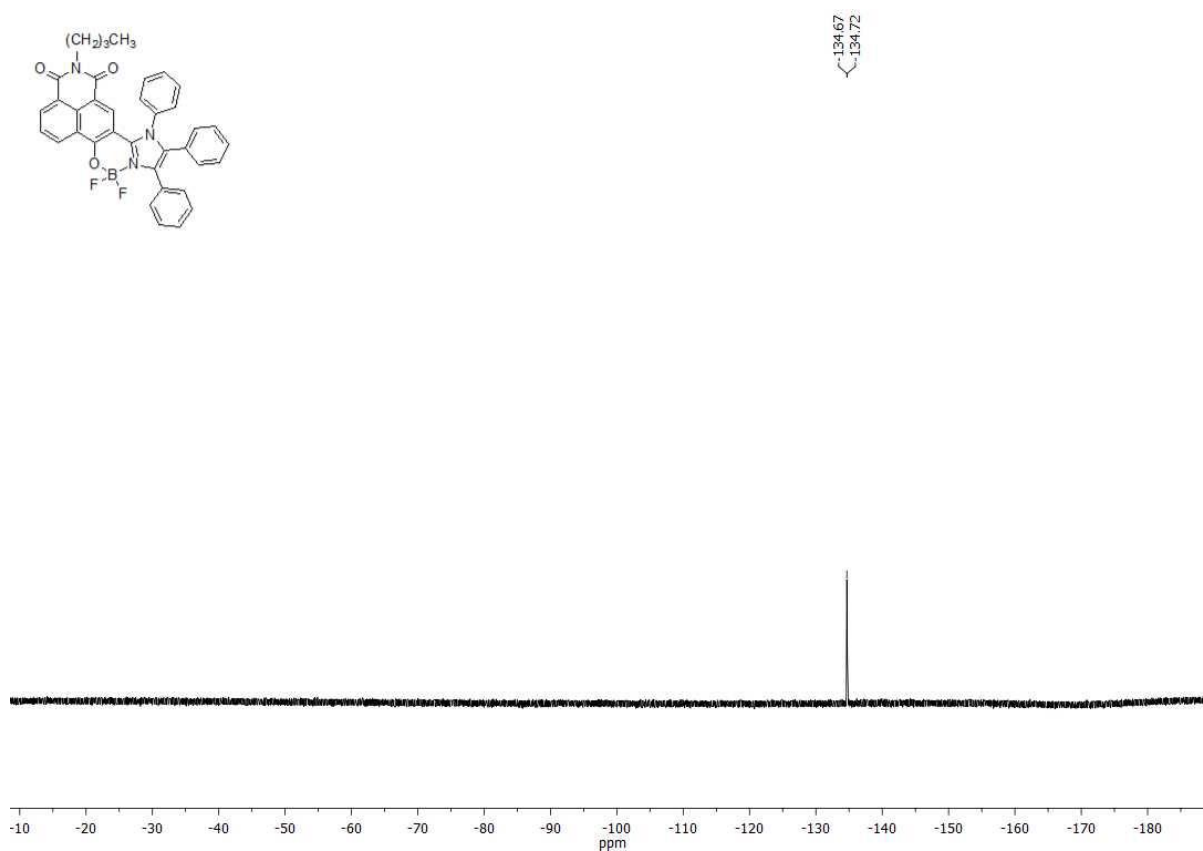

**Figure S7:**  $^{19}\text{F}$  NMR spectrum complex 1

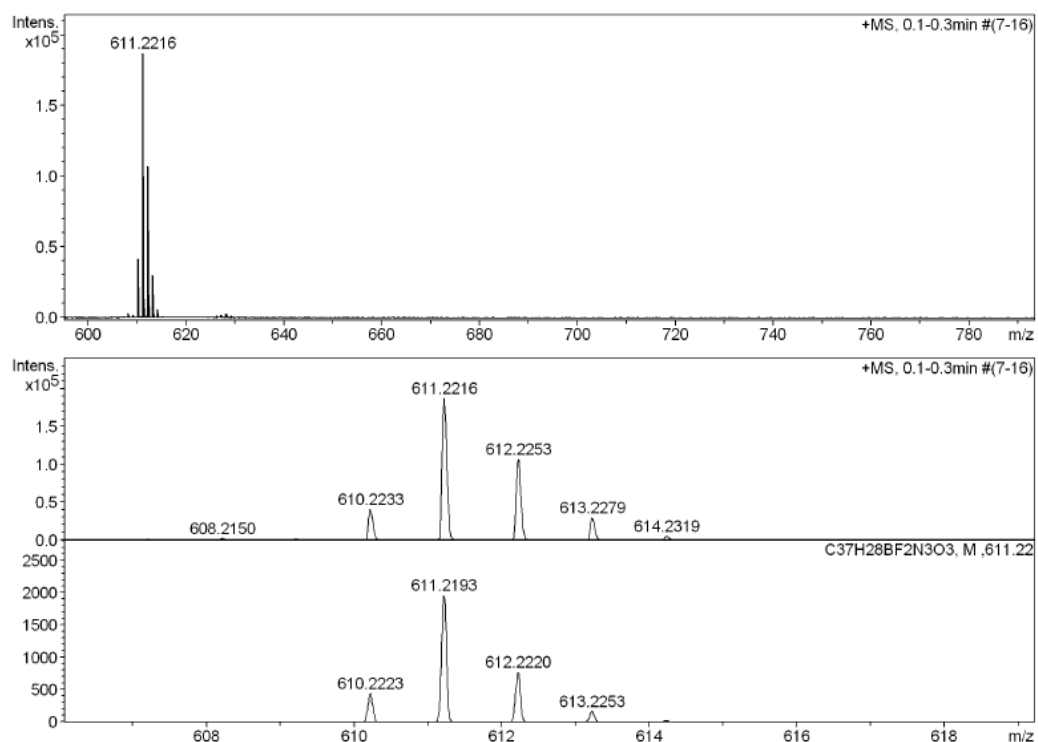

Figure S8: HR-MS of complex 1

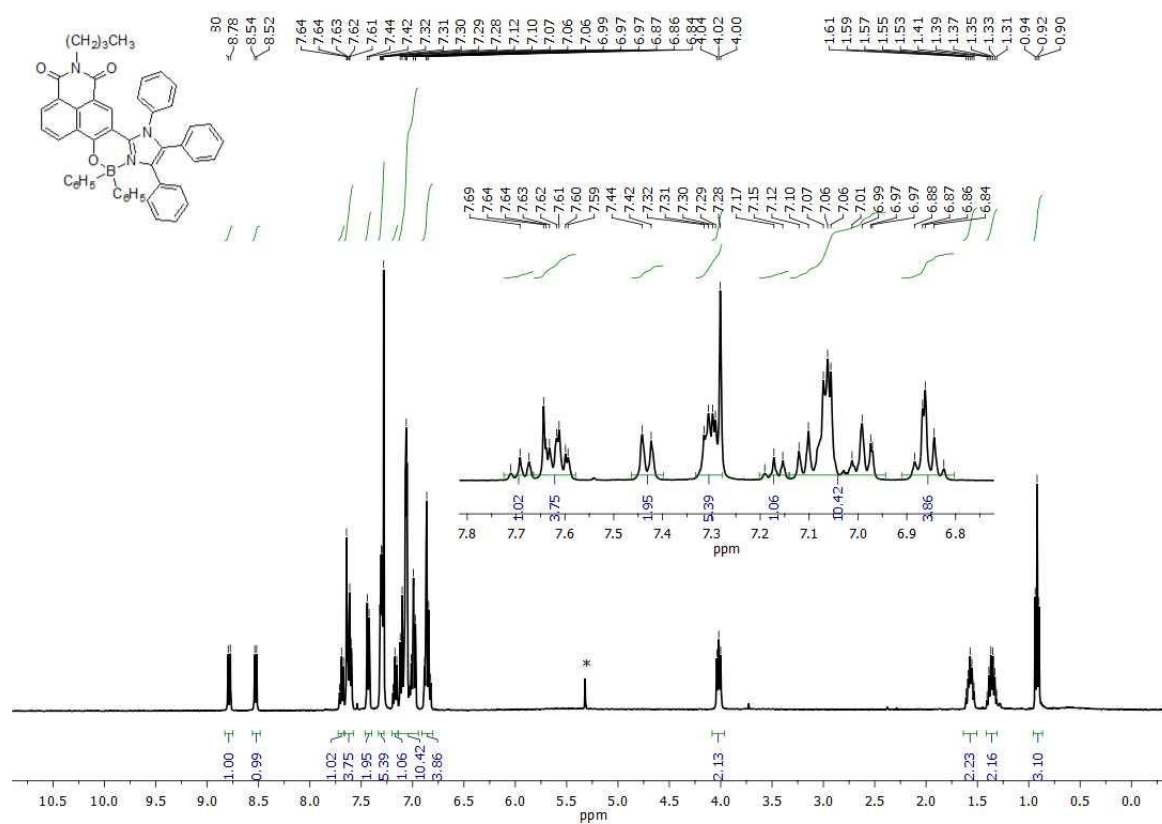

Figure S9: <sup>1</sup>H NMR spectrum of complex 2

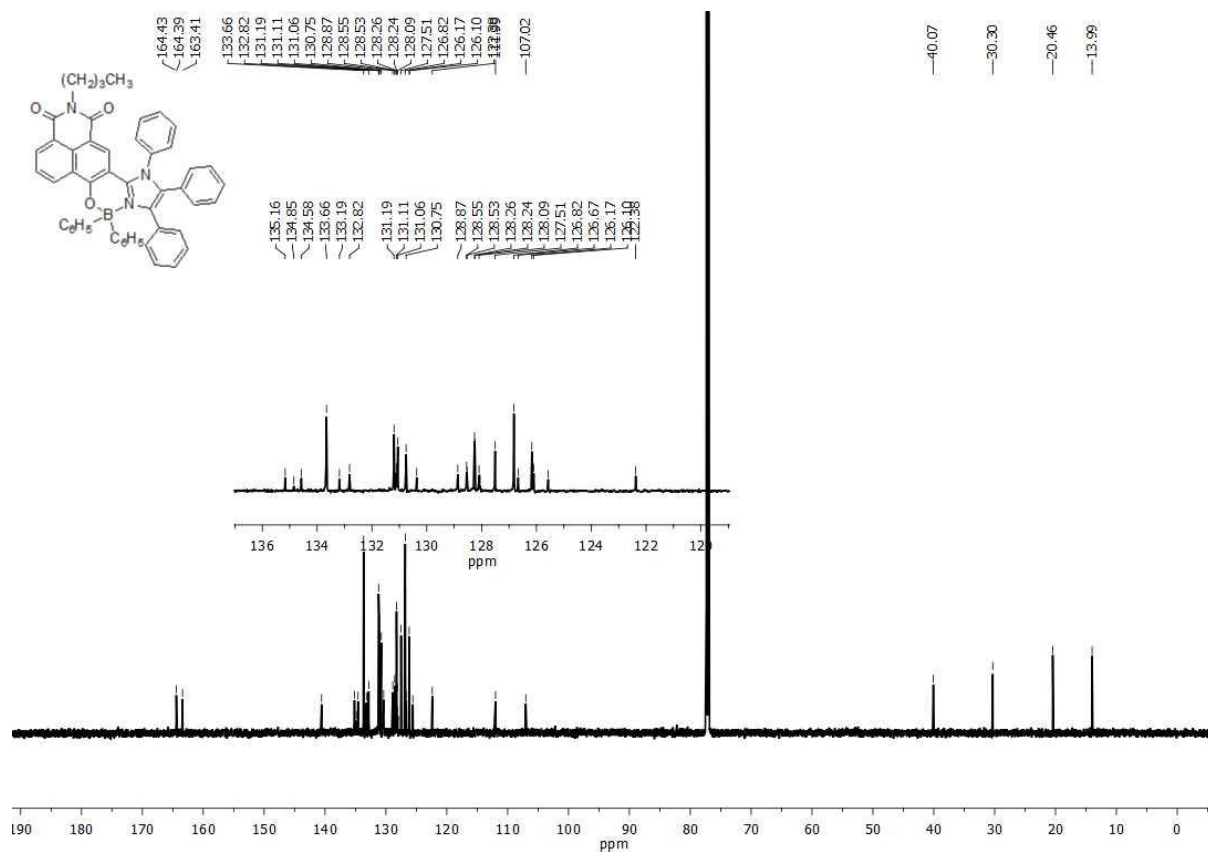

**Figure S10:**  $^{13}\text{C}$  NMR spectrum of complex 2

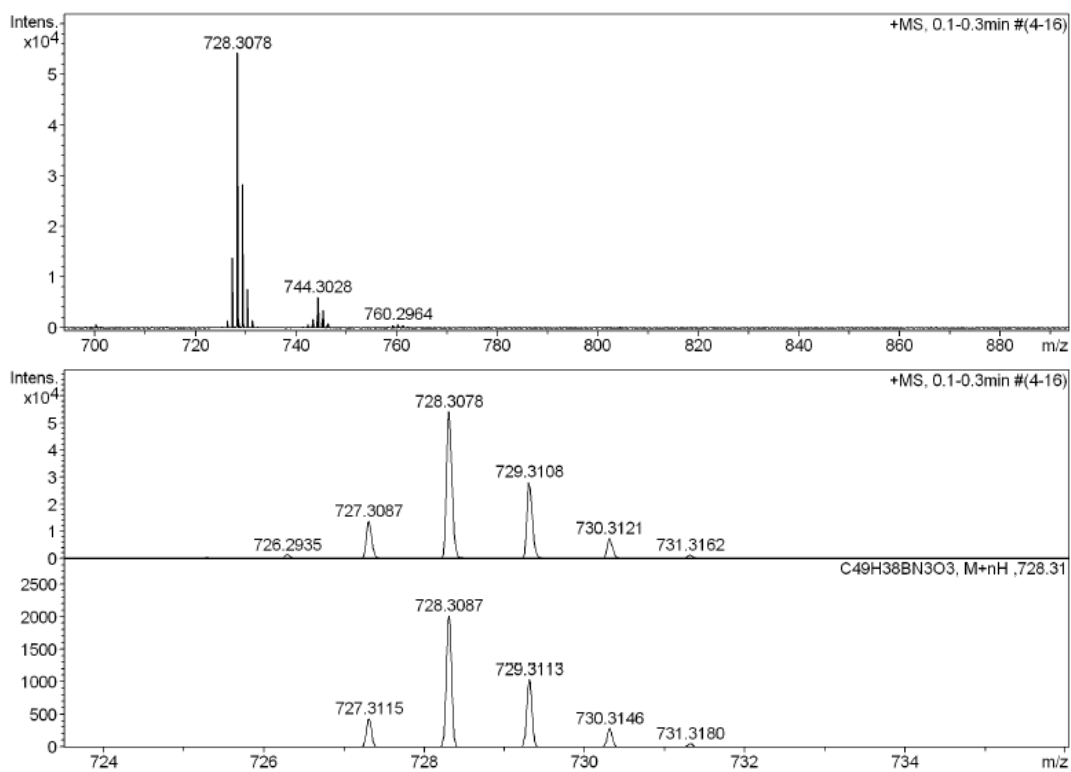

**Figure S11:** HR-MS of complex 2

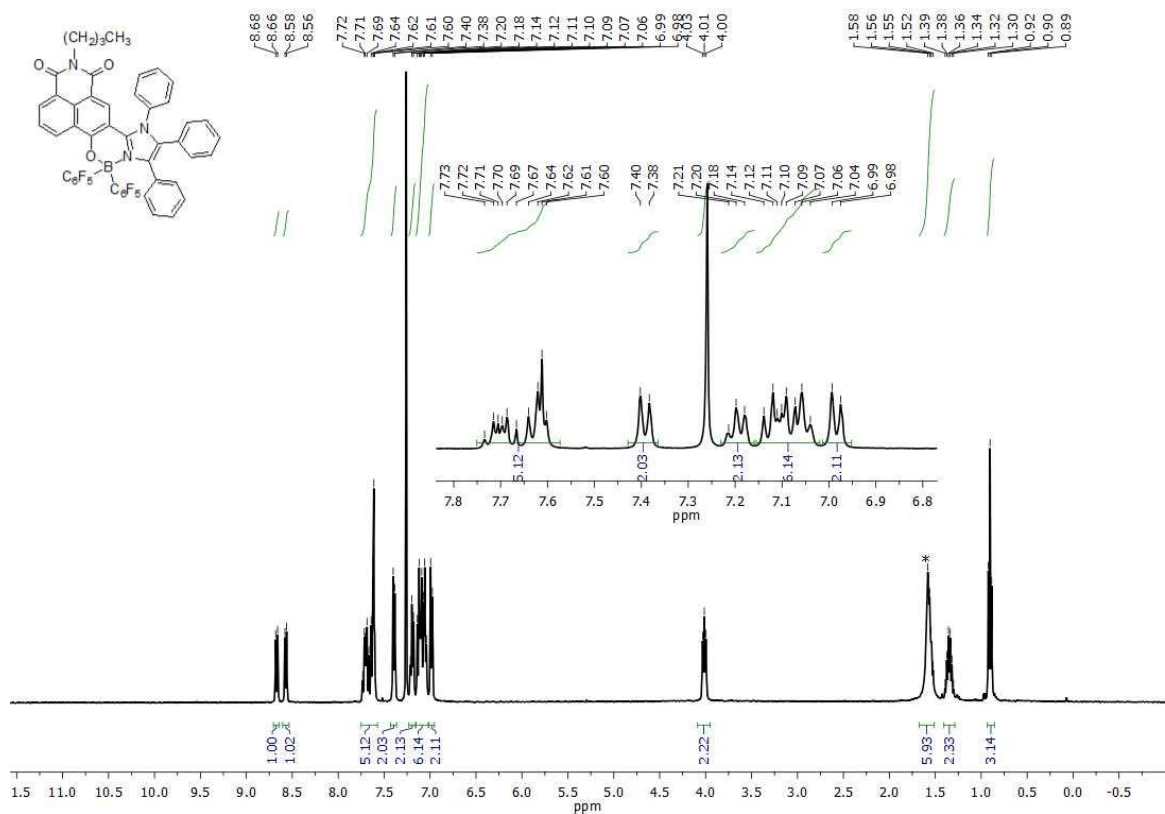

**Figure S12:**  $^1\text{H}$  NMR spectrum of complex 3

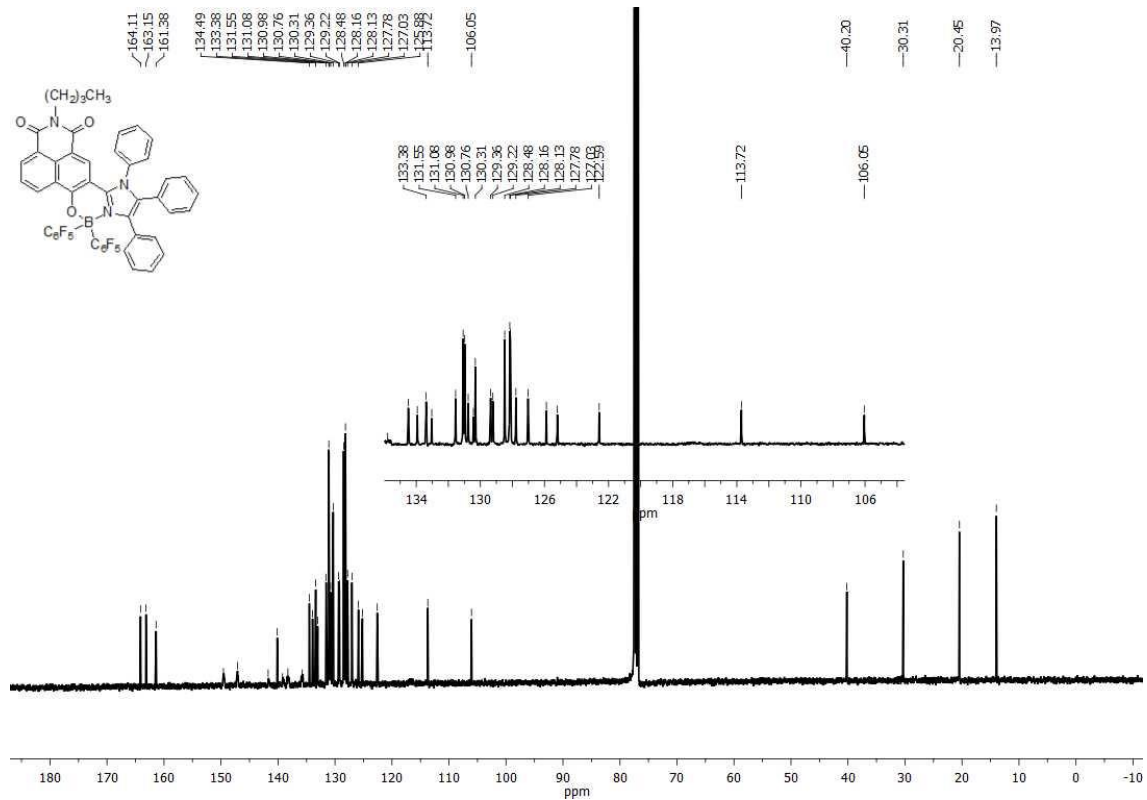

**Figure S13:**  $^{13}\text{C}$  NMR spectrum of complex 3

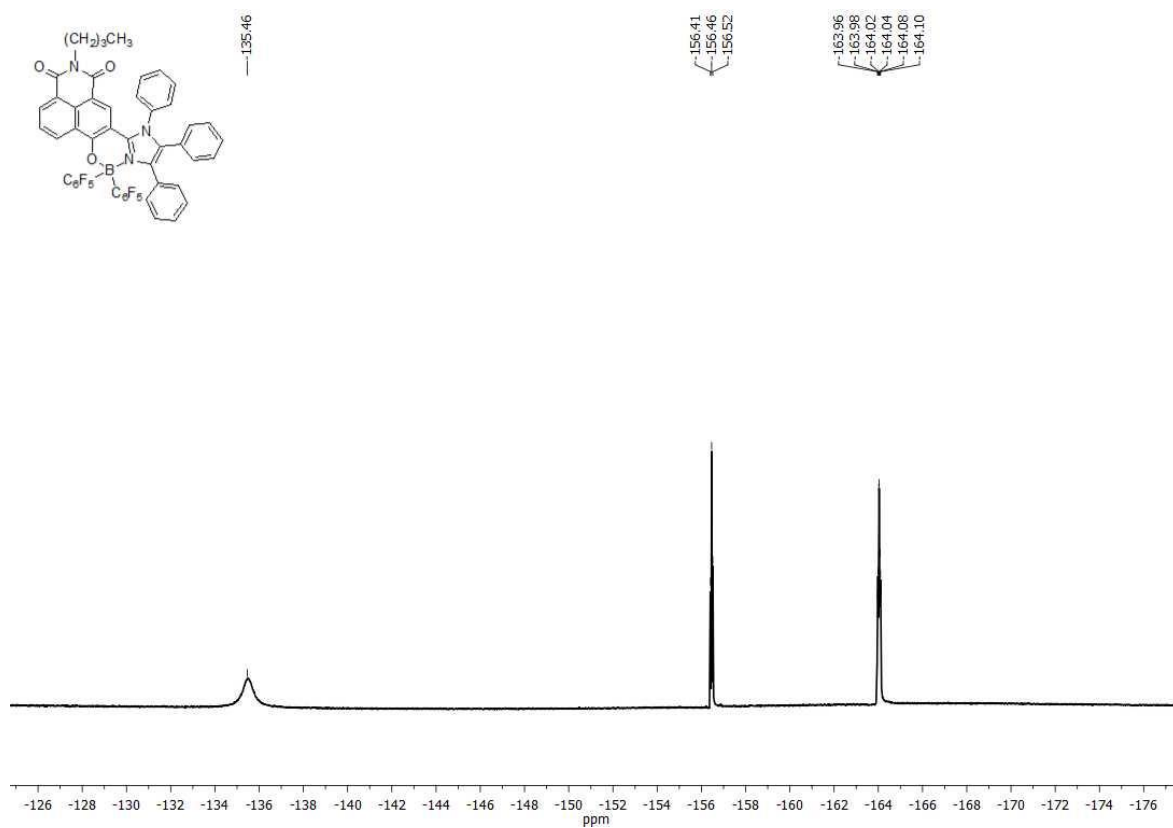

**Figure S14:**  $^{19}\text{F}$  NMR spectrum of complex 3

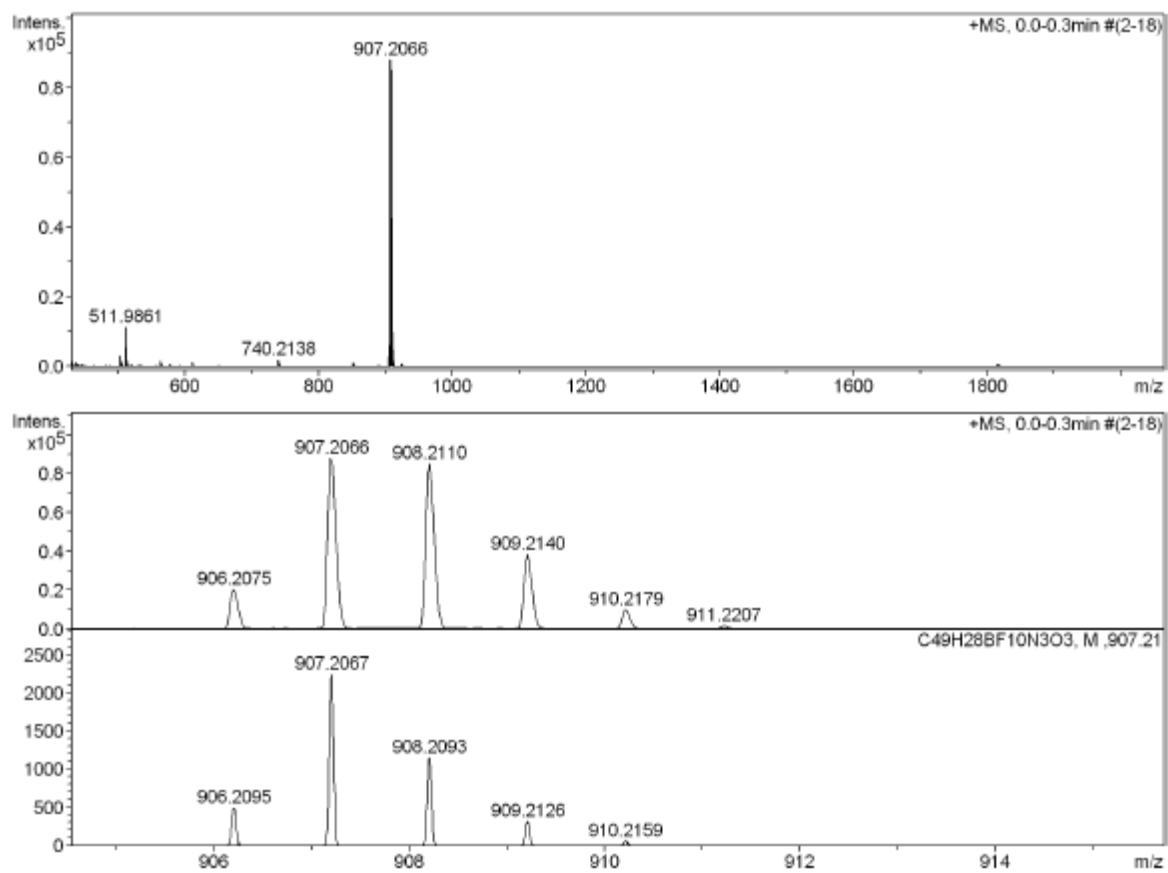

**Figure S15:** HR-MS of complex 3

## References:

- (1) Sheldrick, G. M. *Acta Crystallogr. Sect. A: Found. Crystallogr.* **2008**, *64*, 112.
- (2) Allen, A. J.; Hajdu, J.; McIntyre, G. J. *J. Appl. Crystallogr.* **2018**, *51*, 233.
